# Supplementary material
Source: PubMed Central journal article supplement (PMC7077330)
Supplement: NIHMS1565584-supplement-9.pdf [file NIHMS1565584-supplement-9.pdf]

|                                                         | PV-infected cells | PV-infected cells treated with GnHCl |
|---------------------------------------------------------|-------------------|--------------------------------------|
| Total number of LDs                                     | 189               | 167                                  |
| Number of LDs within a distance of 30nm from the RCs    | 117               | 13                                   |
| Percentage of LD within a distance of 30nm from the RCs | 62%               | 8%                                   |

**Table S1.** Quantification of LD-RC membrane contact sites in TEM images of PV-infected cells at 6hpi, related to Figures 2, 7E and S6. The number of LDs which are within a distance of 30nm from at least one RC was scored in thin TEM sections of randomly chosen PV-infected cells and PV-infected cells treated with GnHCl at 4hpi (14 cells for each condition in 2 independent experiments).

| Treatment              | HeLa cell viability<br>(% of DMSO treated cells, mean±SD) | Huh7 cell viability<br>(% of DMSO treated cells, mean±SD) | Caco2 cell viability<br>(% of DMSO treated cells, mean±SD) | RD cell viability<br>(% of DMSO treated cells, mean±SD) |
|------------------------|-----------------------------------------------------------|-----------------------------------------------------------|------------------------------------------------------------|---------------------------------------------------------|
| CAY10499<br>(20μM)     |                                                           |                                                           |                                                            | 92±2                                                    |
| CAY10499<br>(100μM)    | 95±4                                                      | 87±5                                                      |                                                            |                                                         |
| Atglistatin<br>(100μM) | 98±1                                                      | 87±3                                                      | 94±2                                                       |                                                         |
| PF-04620110<br>(20μM)  | 98±3                                                      | 102±4                                                     |                                                            |                                                         |

**Table S2.** A summary of cell viability under various pharmacological treatments used in this study, related to Figures 5, 6 and S4. Cell viability was measured by the CellTiter-Glo luminiscent cell viability assay (Promega). Mean ± standard deviation values normalized to control DMSO-treated cells from 2 independent experiments are shown.

| Construct        | Oligos  |                                                                          |
|------------------|---------|--------------------------------------------------------------------------|
| rat HSL-Myc      | Forward | 5'AGGAAGCTTGACATGGATTACGCACAATGACAC<br>AG 3'                             |
|                  | Reverse | 5'AAGCTCGAGTTAAACCAGATCCTCTTCAGAGATG<br>AGTTTCTGCTCGGTCAGCGGTGCAGCAGG 3' |
| Strep-2B(1-57)   | Forward | 5' AAAGAATTCACCATGGGCATCACCAATTAC 3'                                     |
|                  | Reverse | 5' AAAC TCGAGGTTCTAGTTATAATAACTAGTGAG<br>GATATGATCTTG 3'                 |
| Strep-2B(56-97)  | Forward | 5' AAAGAATTCAGGATGAGGAACTATGAAGACACC<br>ACAACAG 3'                       |
|                  | Reverse | 5' AGGCTCGAGTTGCTTGATGACATAAGGTATCTCC 3'                                 |
| Strep-2C(1-38)   | Forward | 5' AAAGAATTCAGGATGGGTGACAGTTGGTTGAAG<br>AAG 3'                           |
|                  | Reverse | 5' AAAGTCGACGATAATTTCTCCTTGAGCCAATC 3'                                   |
| Strep-2C(1-67)   | Forward | 5' AAAGAATTCAGGATGGGTGACAGTTGGTTGAAG<br>AAG 3'                           |
|                  | Reverse | 5' AAAC TCGAGGCATGATTGGTGTATAGTTGAGATT<br>TG 3'                          |
| Strep-2C(1-91)   | Forward | 5' AAAGAATTCAGGATGGGTGACAGTTGGTTGAAG<br>AAG 3'                           |
|                  | Reverse | 5' AGTGTCGACGGCAAACCTCTTAGACTGGATG 3'                                    |
| Strep-2C(40-329) | Forward | 5'AAAGAATTCAGGATGCAAGCTAGAGATAAGTTG<br>GAATTTG 3'                        |

|                  |         |                                                          |
|------------------|---------|----------------------------------------------------------|
|                  | Reverse | 5' AGACTCGAGTTGAAACAAAGCCTCCATACAATTG 3'                 |
| Strep-2CΔ(17-38) | Forward | 5' CATGCAACGCAGCTAAGGGACAAGCTAGAGATA<br>AGTTGGAATTTG 3'  |
|                  | Reverse | 5' CAAATTCCA ACTTATCTCTAGCTTGTCCCTTAGCTG<br>CGTTGCATG 3' |

**Table S3.** A list of oligonucleotide primers used in PCR for the generation of constructs described in this study, related to STAR Methods.
