# Supplementary material
Source: PubMed Central journal article supplement (PMC7077330)

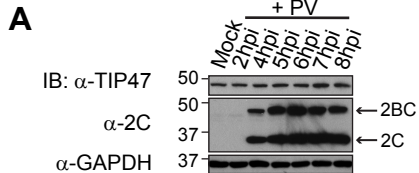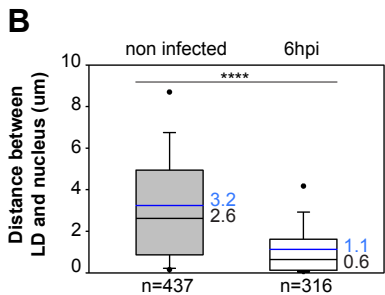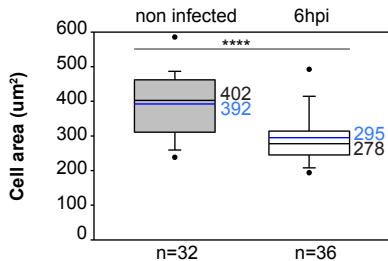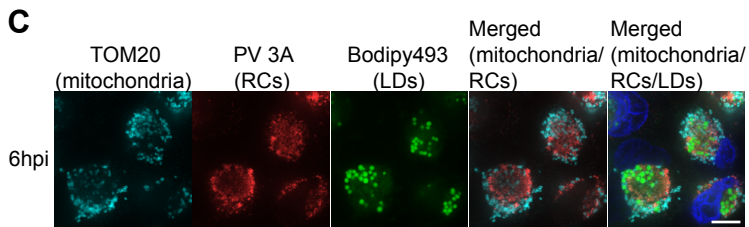

Supplement: NIHMS1565584-supplement-1.pdf [file NIHMS1565584-supplement-1.pdf]

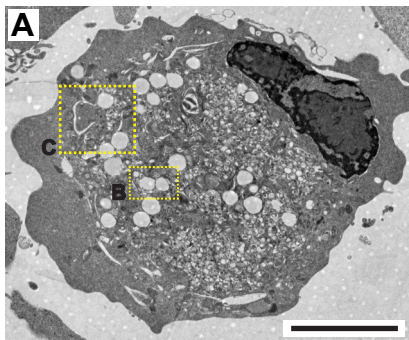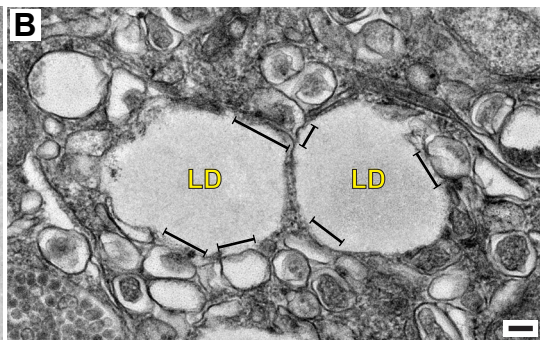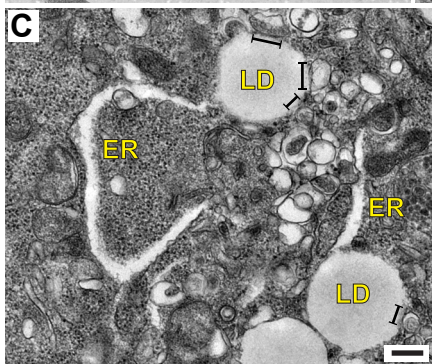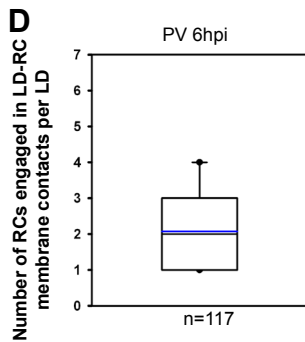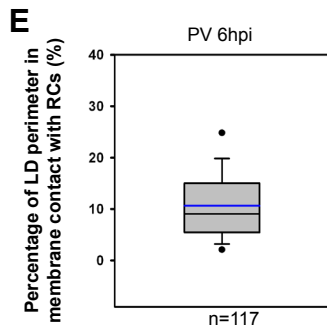

Supplement: NIHMS1565584-supplement-2.pdf [file NIHMS1565584-supplement-2.pdf]

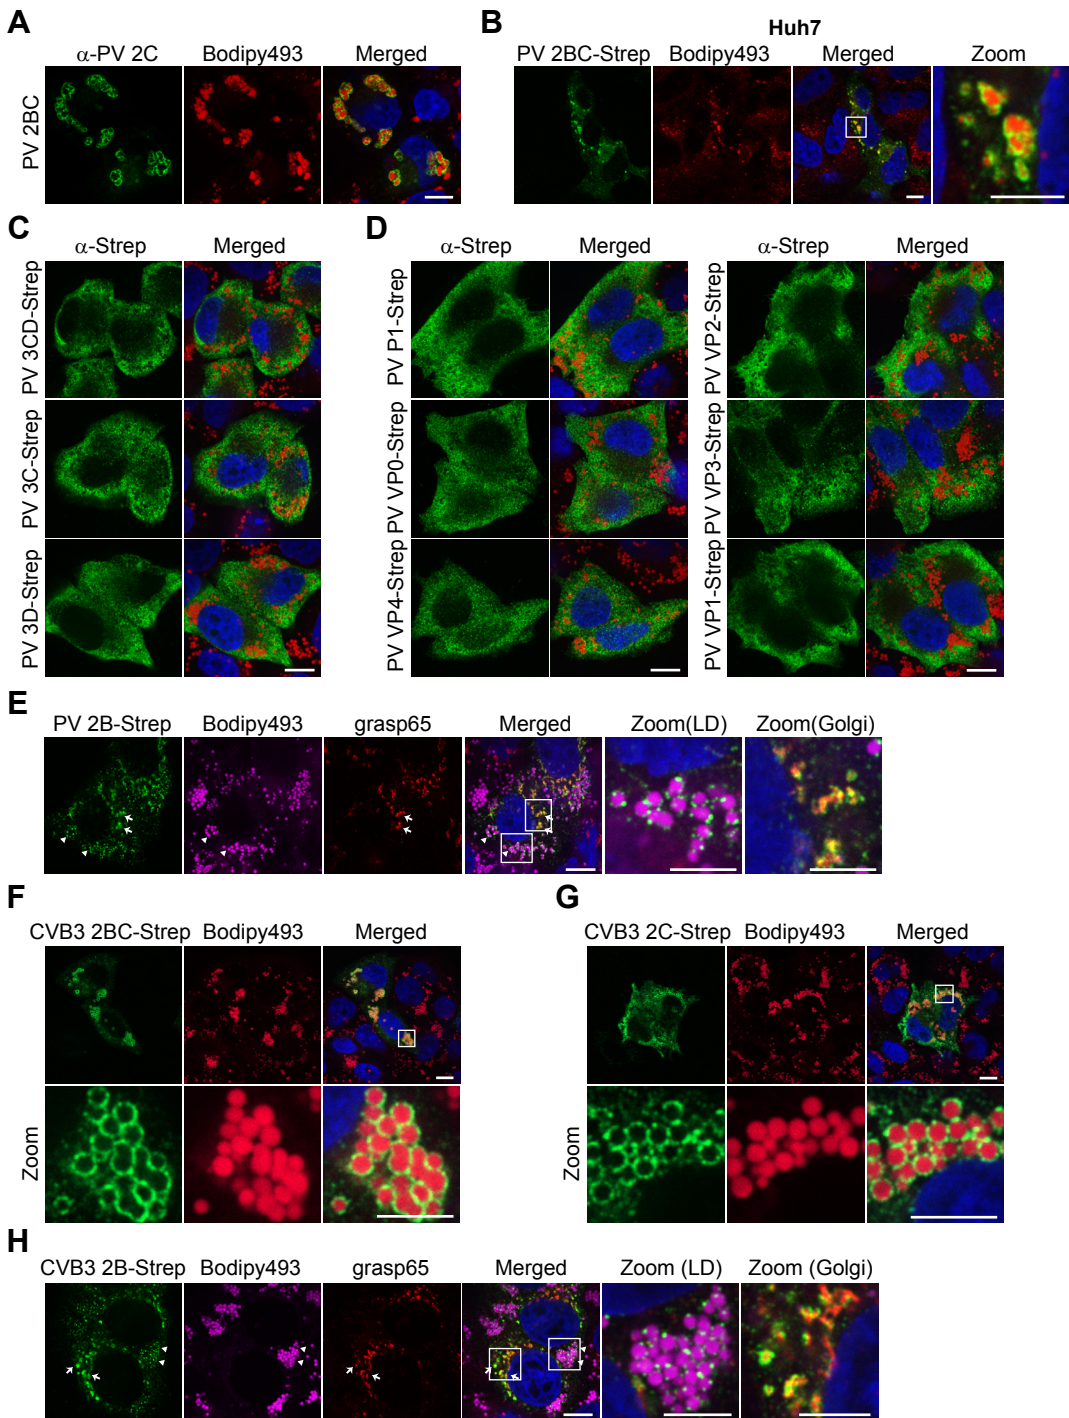

Supplement: NIHMS1565584-supplement-3.pdf [file NIHMS1565584-supplement-3.pdf]

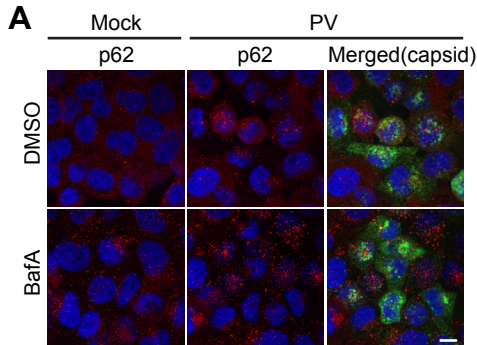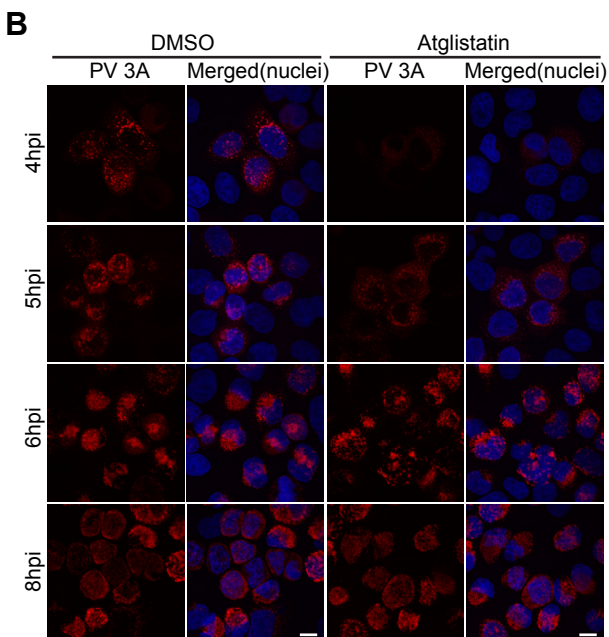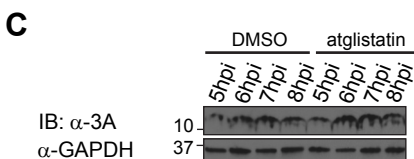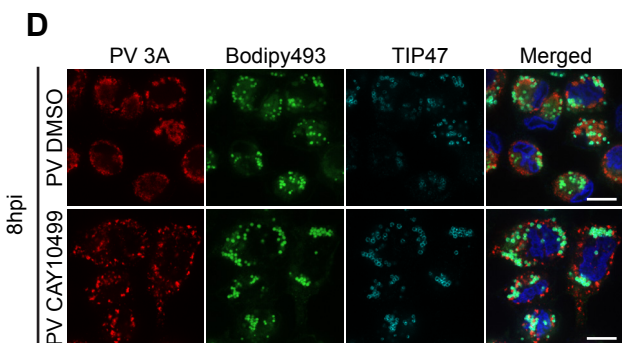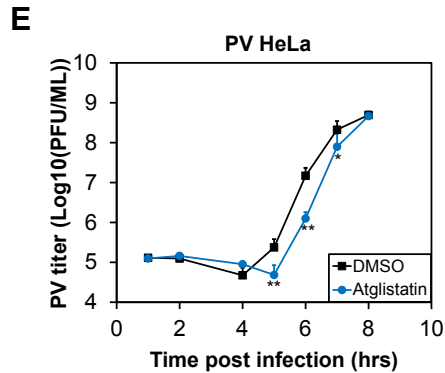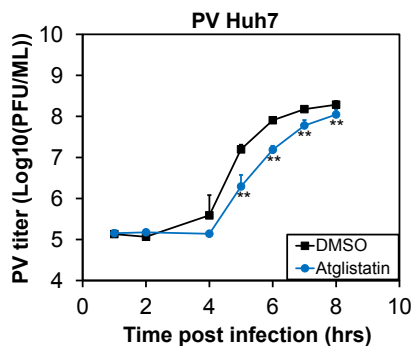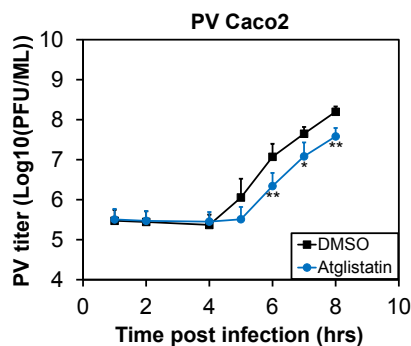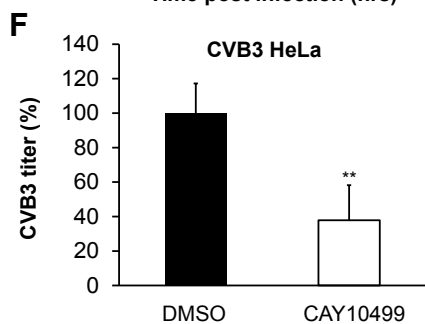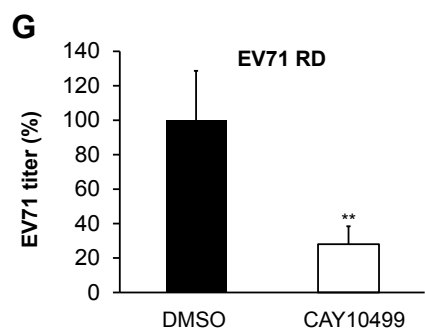

Supplement: NIHMS1565584-supplement-4.pdf [file NIHMS1565584-supplement-4.pdf]

**A**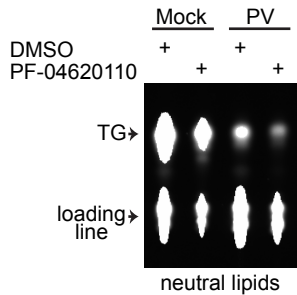**B**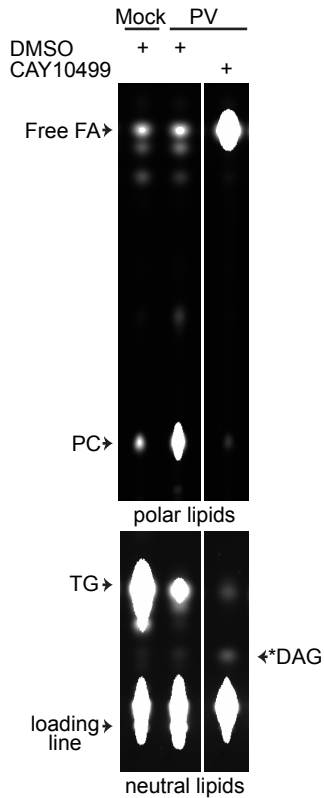

Supplement: NIHMS1565584-supplement-5.pdf [file NIHMS1565584-supplement-5.pdf]

**A**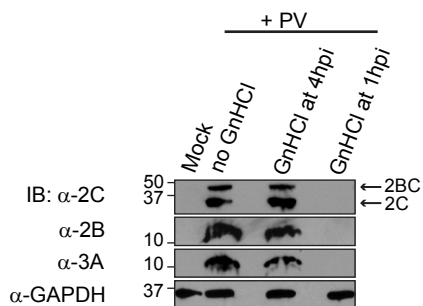**B**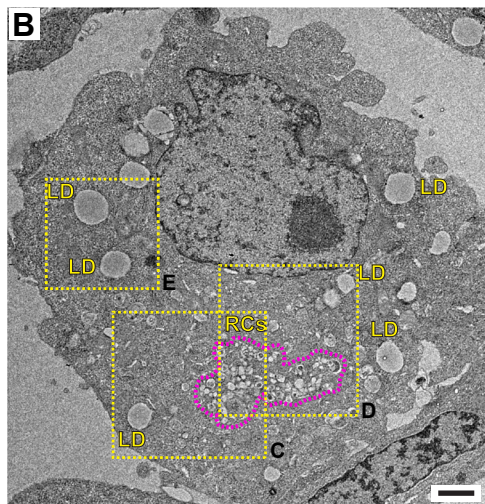**C**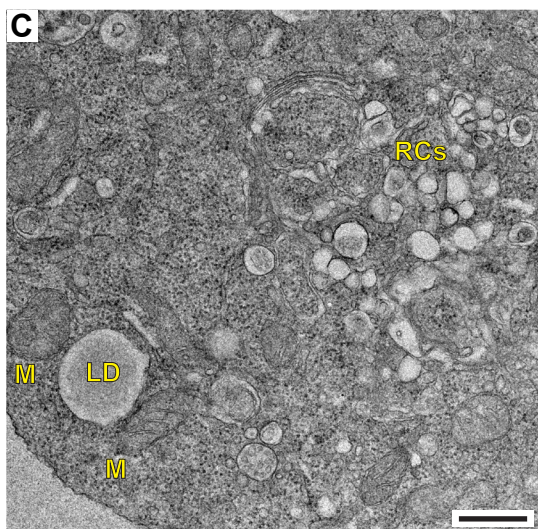**D**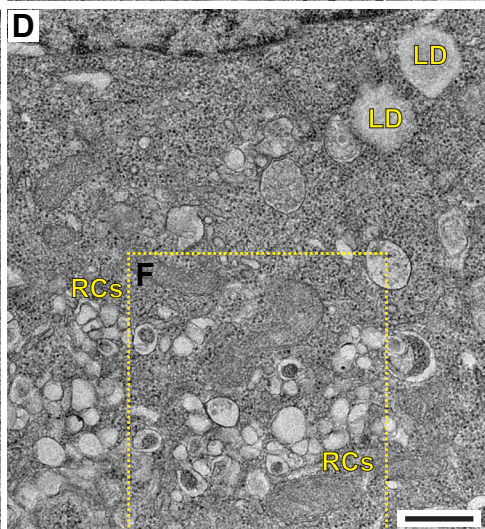**E**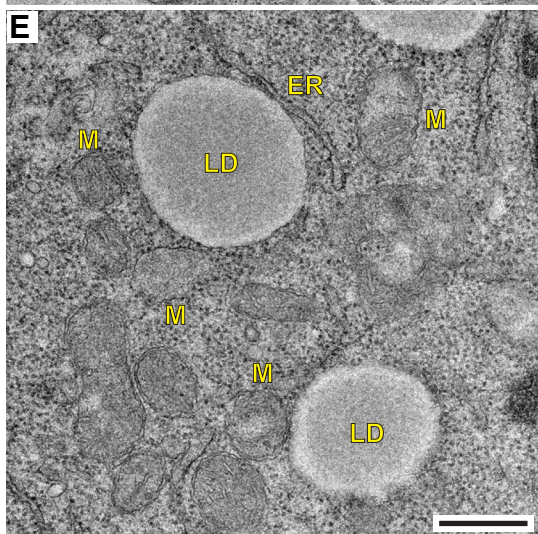**F**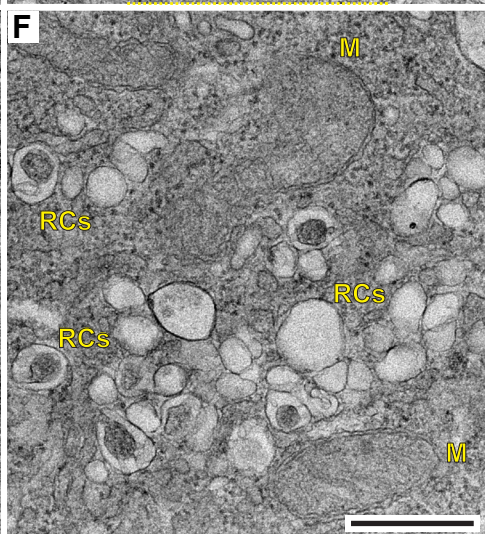

Supplement: NIHMS1565584-supplement-6.pdf [file NIHMS1565584-supplement-6.pdf]

PV 2C-Strep

Bodipy493

Merged

Zoom (Strep) Zoom (Merged)

-GnHCl

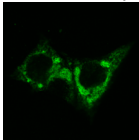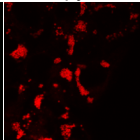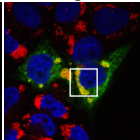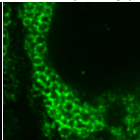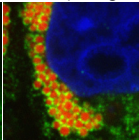

+GnHCl

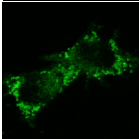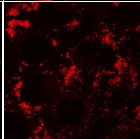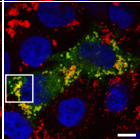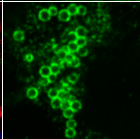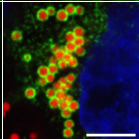

Supplement: NIHMS1565584-supplement-7.pdf [file NIHMS1565584-supplement-7.pdf]
